# Supplementary material
Source: ML conference proceedings conference paper supplement (https://aclanthology.org/2026.bionlp-2.5)
Supplement: SupplementaryMaterial [file framework.pdf › paper/img/framework.pdf]

## Input

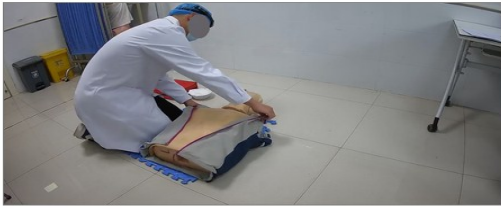

A

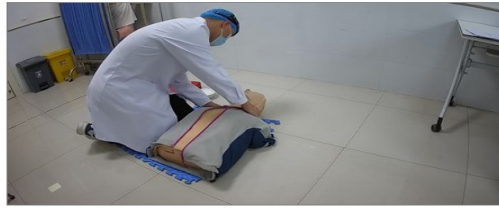

B

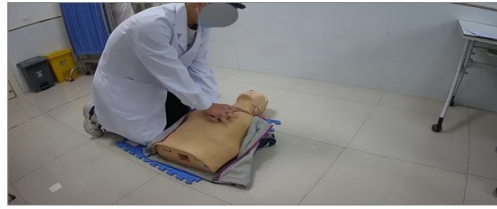

C

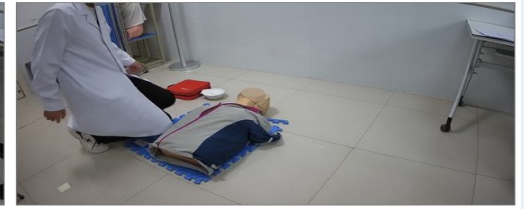

D

## Global Overview

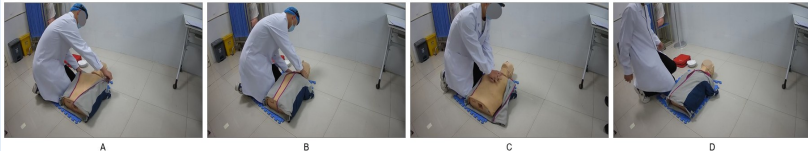

- Extract Main Change Trends
- Identify Early/Late Anchor Frames

## Local Evidence

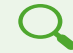

Extract Fine-Grained Clinical Evidence

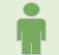

Chest Exposure

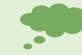

Airway Cues

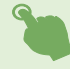

Hand Position

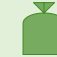

Ventilation Cues

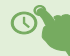

Hand Stability

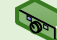

AED Cues

## Sequence Ordering

### EvidenceFlow-M: Model-Driven Sorting

Flexible Sorting Rules

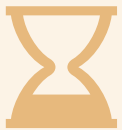

- Analyze Anchor Points
- Sort by flexible global reasoning
- Verify stable Order

### EvidenceFlow-R: Rule-Guided Sorting

Explicit Sorting Rules

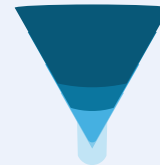

- Correct Stage Labels
- Apply Evidence Constraints
- Adjust Order by Rules

## Output

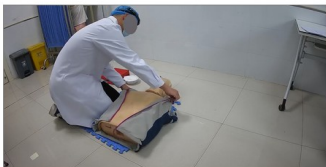

A

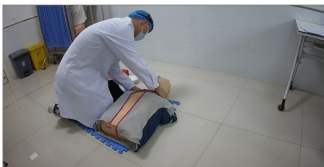

B

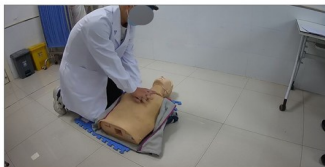

C

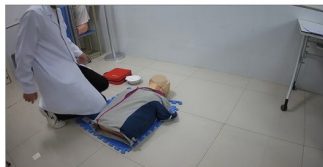

D

- Ordered Sequence
- Natural Language Rationale
